# Supplementary material for: LINC00978 predicts poor prognosis in breast cancer patients
Source: PubMed Central journal article supplement (PMC5126584; doi:10.1038/srep37936), 2016-11-29

## LINC00978 predicts poor prognosis in breast cancer patients

Lin-lin Deng<sup>1,2,+</sup>, Ya-yun Chi<sup>1,3,+</sup>, Lei Liu<sup>1,2</sup>, Nai-si Huang<sup>1,3</sup>, Lin Wang<sup>2,\*</sup>, Jiong Wu<sup>1,3,4,\*</sup>

<sup>1</sup>Department of Breast Surgery, Fudan University Shanghai Cancer Center, 200032, China

<sup>2</sup>Department of General Surgery, the Second Affiliated Hospital of Nanchang University, Nanchang, 330006, China

<sup>3</sup>Department of Oncology, Fudan University, Shanghai Medical College, Shanghai, 200032, China

<sup>4</sup>Collaborative Innovation Center for Cancer Medicine, China

<sup>+</sup>These authors contributed equally to this work

<sup>\*</sup>Corresponding authors: Jiong Wu, e-mail: [wujiong1122@vip.sina.com](mailto:wujiong1122@vip.sina.com); Lin Wang, e-mail: [w71021@163.com](mailto:w71021@163.com)

### Supplementary Information

Figure. S1: Figure legends: RNA Seq Expression profile of LINC00978 in different cancer tissues.

Data resource: NONCODE database (<http://www.bioinfo.org/noncode/>).

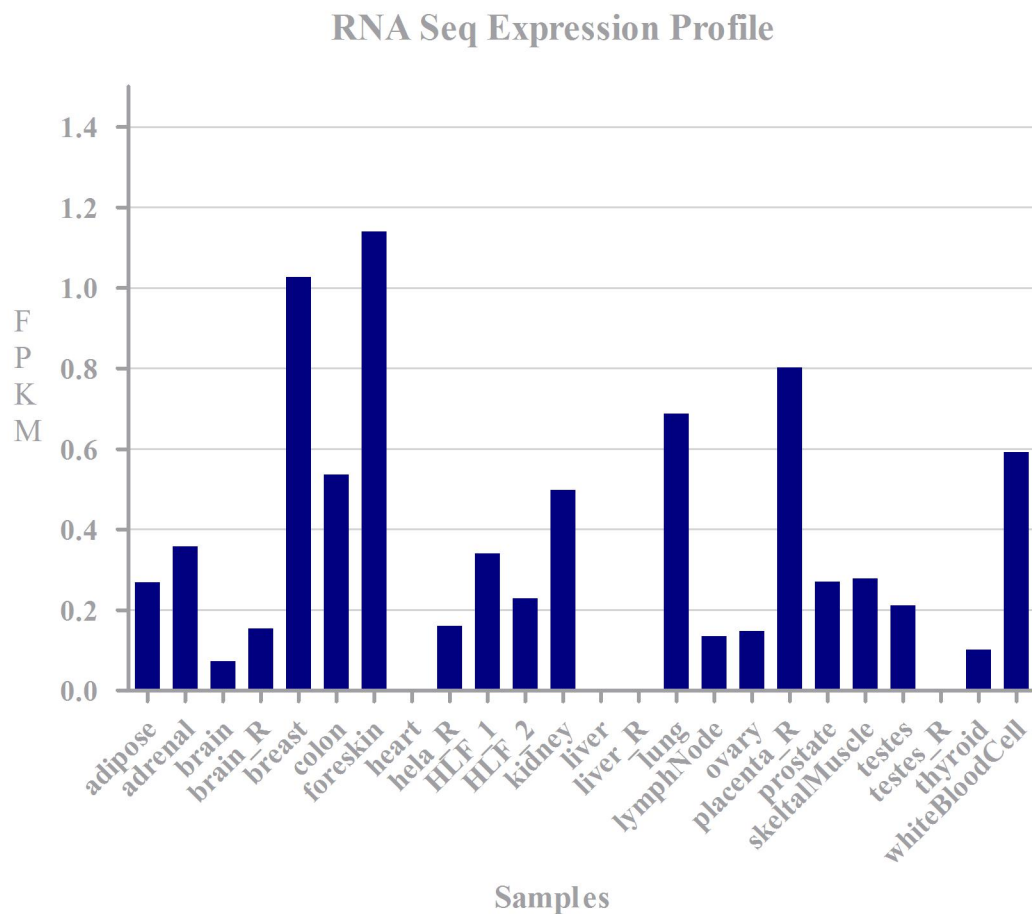

Figure. S2: lncRNA expression in different hormone receptor (HR) -status.

Data resource: TANRIC database

([http://ibl.mdanderson.org/tanric/\\_design/basic/analysis.html](http://ibl.mdanderson.org/tanric/_design/basic/analysis.html)).

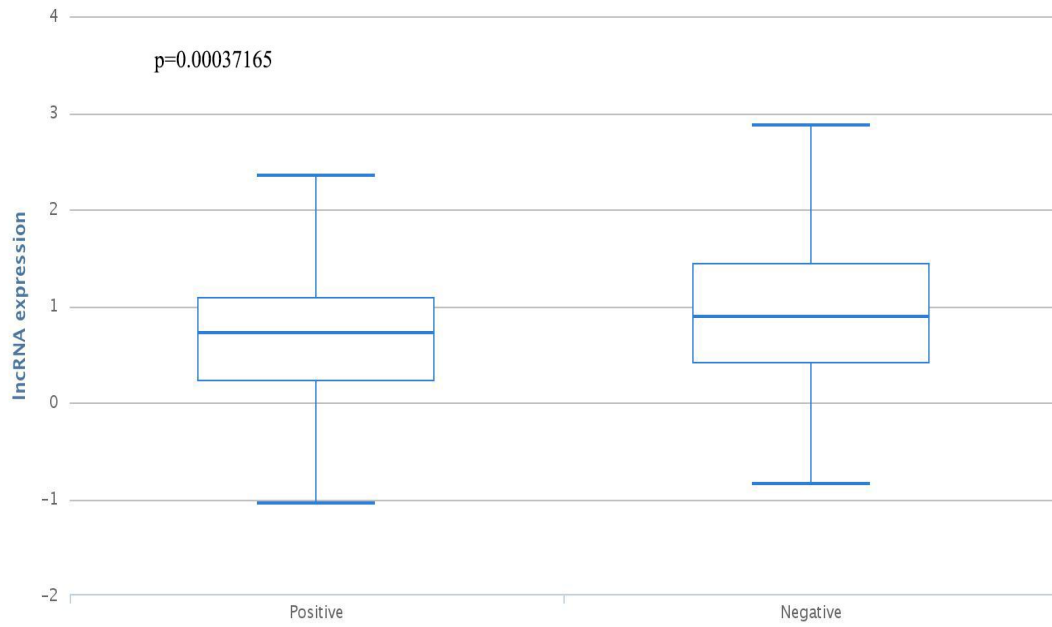

Supplement: srep37936-s1.pdf [file srep37936-s1.pdf]
